# Supplementary material for: Time-course transcriptome analyses of spleen in rainbow trout (Oncorhynchus mykiss) post-Flavobacterium psychrophilum infection
Source: Front Immunol. 2022 Aug 9;13:965099. doi: 10.3389/fimmu.2022.965099 (PMC9396386; doi:10.3389/fimmu.2022.965099)
Supplement: Supplementary file 6 [file Table_3.xlsx]

## Sheet: Sheet1
compared groups	immune gene category
	1<FC<2	2>FC
CKvsD3 up-regulated	plasminogen, fibrinogen, macroglobulin, ladderlectin, CD166, chemotaxin, granzyme, IKBKB, JAK1, MAPK, MAPKKK, MLPH, NALP12, NALP3, NFkBI, NLRC5, perforin, Programmed cell death protein, SOCS7, STAT3, TNFRSF, TRIF, TRIP, UBE, UCH, CDK, CDK related, CDKIs, LTBP, MHC Ⅱ, MHC I, TBRG, TGBR, TNFR, TRAP, C1q, C3, complement factor, ACRs, CCL, CCR, CMKLR1, CXCL, CXCR, EGF, EGFR, FAM, FGF, HB-EGF, IFN rel…	SAA, fibrinogen, macroglobulin, plasminogen, CBX4, CD166, CSF, granzyme, MAPK, NLRC5, perforin, PIAS, TNIP2, TRAF, UBE, UCH, CDK, CDKIs, MLDL1, TNFR, C1q, C3, C3aR, ACRs, CCL, CK-2, CMKLR1, CXCL, CXCR, FAM, FGF, FGFR, IFN related, IFNG, IFNGR, IL1R, IL4, IL8, integrin alpha, IRF1, NFIL3, TITIN, MIF, MMR, antimicrobial peptides, AP1, AP2, C4， CARD, caspase, cathepsin, CEBP, DC related, HIF1a, HSP3…
CKvsD3 down-regulated	plasminogen, fibrinogen, macroglobulin, mmp, CBX, CD166, CD3, CD97, IGFR, JAK1, MAPK, MAPKKK, NALP1, NALP3, NFkBI, NLRC3, NLRC5, PIAS, Programmed cell death protein, SOCS1, SOCS4, SOCS7, TRAF, UBE, UCH, CDK, CDK related, MHC I, microglobulin, TNFAIP, TNFR, VEGF, C1q, C1q related, C3, C4, ACRs, CCL, CCR, CKLF, CXCL, CXCR, FAM, FGF, FGFBP, FGFR, FIBP, IFI, IFN, IFN related, IFNB, IFNG, IFNLR, IL16,…	fibrinogen, mmp, plasminogen, CBX4, CD80, chemotaxin, KIT, MAPK, MAPKKK, NFkb, NLRC5, perforin, Programmed cell death protein, SOCS6, SOCS7, TTRAP, UBC, UCH, CDK, LRMP, MHC I, TBRG, TNF10, TNFAIP, TNFR, VEGFRC1q, C1q related, C8, complement factor, ACRs, CCL, CCR, CXCR, EGF, FAM, FGF, FGFR, IFN related, IFNAR, IL18R, IL20, IL2R, IL34, IL6R, integrin alpha, integrin beta, IRF2, IRF3, IRF4, Mx, TIT…
CKvsD7 up-regulated	plasminogen, fibrinogen, macroglobulin, mmp, chemotaxin, IKBKB, JAK1, MAPK, MAPKKK, MLPH, NALP12, NALP3, NLRC4, NLRC5, perforin, PIAS, Programmed cell death protein, SOCS6, STAT3, TRAF, UBE, UCH, CDK, CDK related, CDKIs, LTBP, MHC Ⅱ, TBRG, TGBR, TNFR, TRAP, C6, ACRs, CK-2, CMKLR1, CXCL, CXCR, EGFR, FAM, FGF, FGFR, IFN related, IFNA, IFNGR, IFNLR, IL1, IL16, IL17R, IL8, integrin alpha, integrin be…	SAA, fibrinogen, macroglobulin, plasminogen, CBX4, CD166, CSF, MAPK, NLRC3, NLRC5, PIAS, Programmed cell death protein, SOCS3, TNIP2, TRAF, UBE, UCH, CDKIs, MHC Ⅱ, MLDL1, TGBR, TNFR, C1q, C3, C3aR, ACRs, CCL, CMKLR1, CXCL, EGF, FAM, FGF, FGFR, IFN related, IL1R, integrin alpha, TITIN, MMR, NCAM, ACVR, alkaline phosphatase, antimicrobial peptides, AP1, C4, CARD, CEBP, fibrinectin, HIF1a, HSBP, HSP…
CKvsD7 down-regulated	fibrinogen, macroglobulin, mmp, CD3, CD97, chemotaxin, granzyme, IGFR, JAK2, MAPK, NALP1, NALP12, NALP3, NFkb, NKAP, NLRC5, Programmed cell death protein, SOCS7, TTRAP, UBE, UCH, CDK, CDK related, LRMP, MHC Ⅱ, MHC I, TNF10, TNFAIP, TNFR, VEGF, C1q, C1q related, C1r, CR2, ACRs, CCL, CCR, CXCL, CXCR, EGF, FAM, FGF, FGFBP, IFN related, IFNAR, IFNB, IFNG, IL12, IL17, IL20, IL6R, ILF2, integrin alpha,…	plasminogen, CD166, MAPK, MAPKKK, NFkBI, NLRC5, SOCS1, TRIP, UBE, UCH, CDK, CIITA, MHC Ⅱ, MHC I, microglobulin, TBRG, TGBR, TNFAIP, C1q, C3, ACRs, CCR, CKLF, CXCR, FAM, IFN related, IFNAR, IL16, IL21, IL2R, IL6R, integrin beta, IRF3, IRF4, IRF5, TITIN, MMR, ACTININ, AP1, AP2, apoptpsis related, caspase, cathepsin, FBH1, fibrinectin, HSP related, HSP70BP, lysosome, mucin, palladin, PBOX10, PKR, pr…
